# Supplementary material
Source: Royal Society of Chemistry journal article supplement (doi:10.1039/d6an00060f)
Supplement: d6an00060f1.pdf [file d6an00060f1.pdf]

754 (63) Nasir, N.; Sayeed, M. A.; Jamil, B. *Ralstonia pickettii* Bacteremia: An Emerging Infection  
755 in a Tertiary Care Hospital Setting. *Cureus* **2019**, *11* (7), e5084. DOI: 10.7759/cureus.5084  
756 From NLM.

757

758

759

760

761

762

763

764

765

766

767

768

769 **Supplemental Information**

770

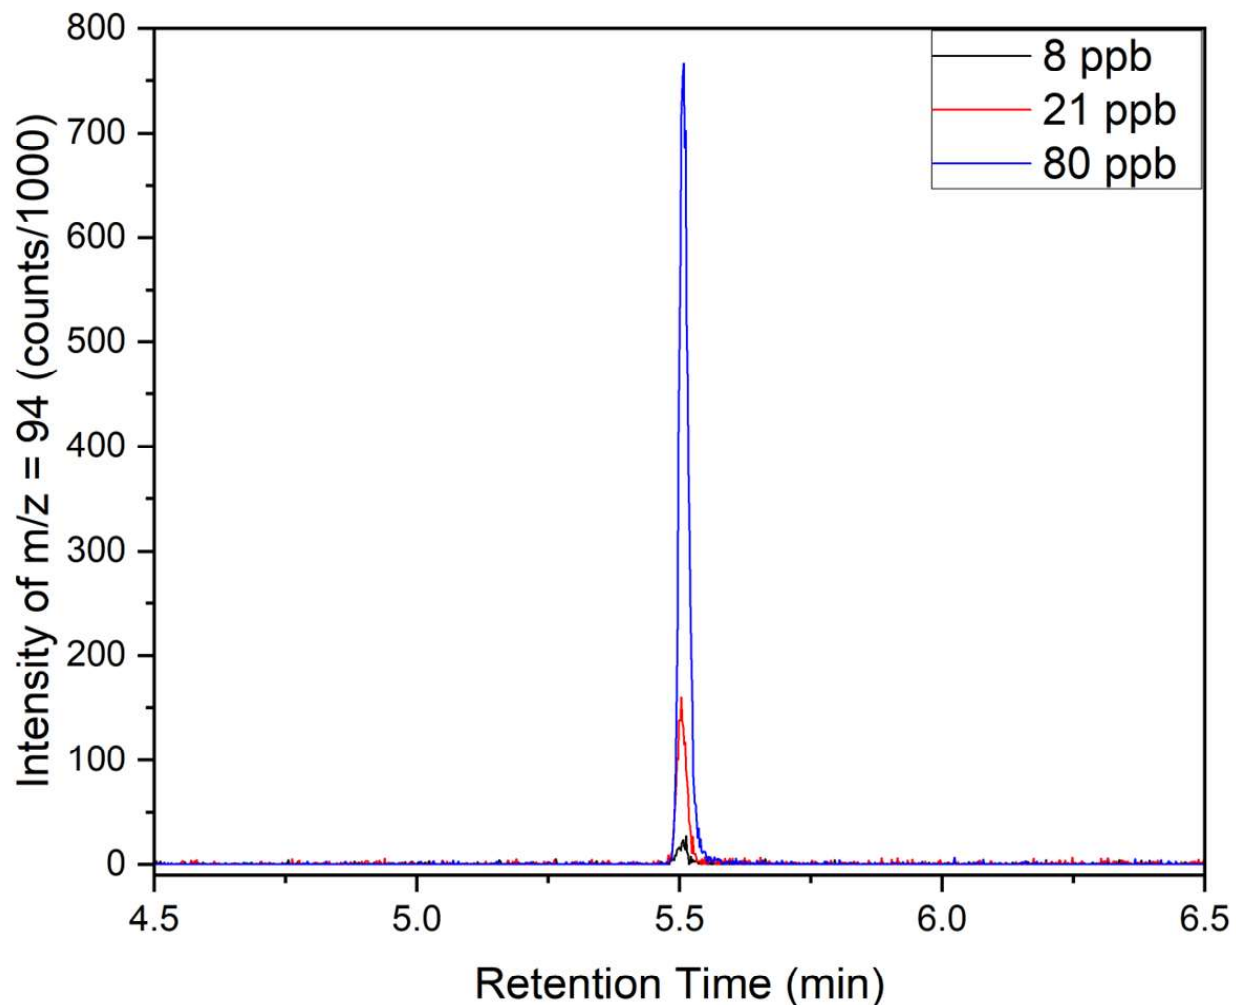

771  
 772 **Figure S1 – Extracted ion chromatograms of dimethyldisulfide (DMDS) standards**  
 773 **confirming the identification of DMDS in Figure 1.**

774  
 775  
 776 DMDS standards ranging from 8 to 840ppb were prepared and analyzed with GC-MS.

777 The extracted ion chromatograms (EIC) for m/z = 94 were used to obtain peak areas which  
 778 were plotted in a calibration curve shown in **Figure S2**. The LOD was calculated using  
 779 equation S1.

780 
$$LOD = \frac{3.3\sigma}{S} \qquad \text{Eq S1}$$

781 Where  $\sigma$  signifies the residual of the actual peak area and the predicted peak area based  
782 on the equation of the calibration curve, and S represents the slope of the calibration  
783 curve.

784

785 The LOD was further evaluated using the signal-to-noise ratio (SNR) approach. Noise levels  
786 were measured at the retention time of DMDS across eight ersatz blank chromatograms  
787 and averaged. This average noise level was multiplied by three to define a peak area  
788 corresponding to an SNR of 3. DMDS peaks observed in chromatograms obtained from  
789 culture headspaces were compared to this threshold, as well as to the LOD determined  
790 using Eq. S1. Peaks exceeding both criteria were considered detectable and were  
791 subsequently reported.

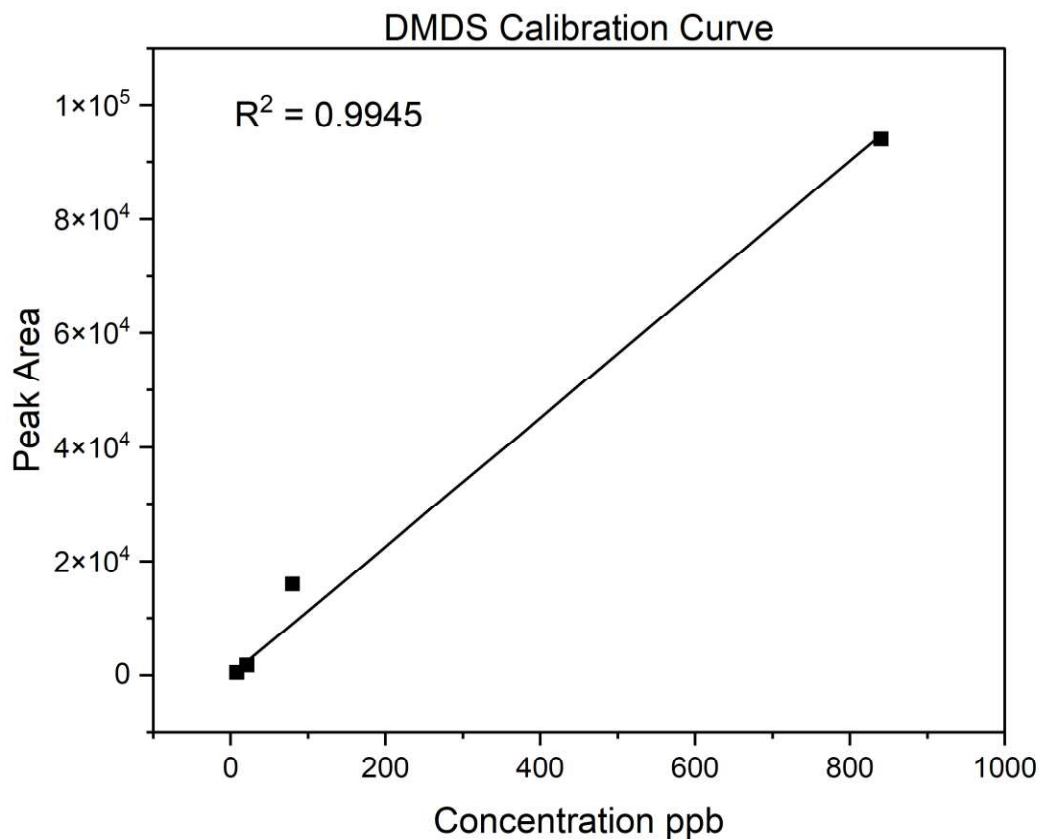

792  
793

794 **Figure S2- Calibration curve prepared from DMDS standards at 8, 21 and 840ppb.** The  
795 quantitative analysis in this study served only to determine when DMDS exceeded the  
796 detection limit. Because DMDS did not show a strong correlation with population growth,  
797 presence of DMDS serves as the indicator of bacteria in this study rather than the  
798 concentration. Therefore, the quantitative analysis performed is not exhaustive and a more  
799 rigorous quantitation should be performed in applications that require accurate DMDS  
800 concentrations.

801

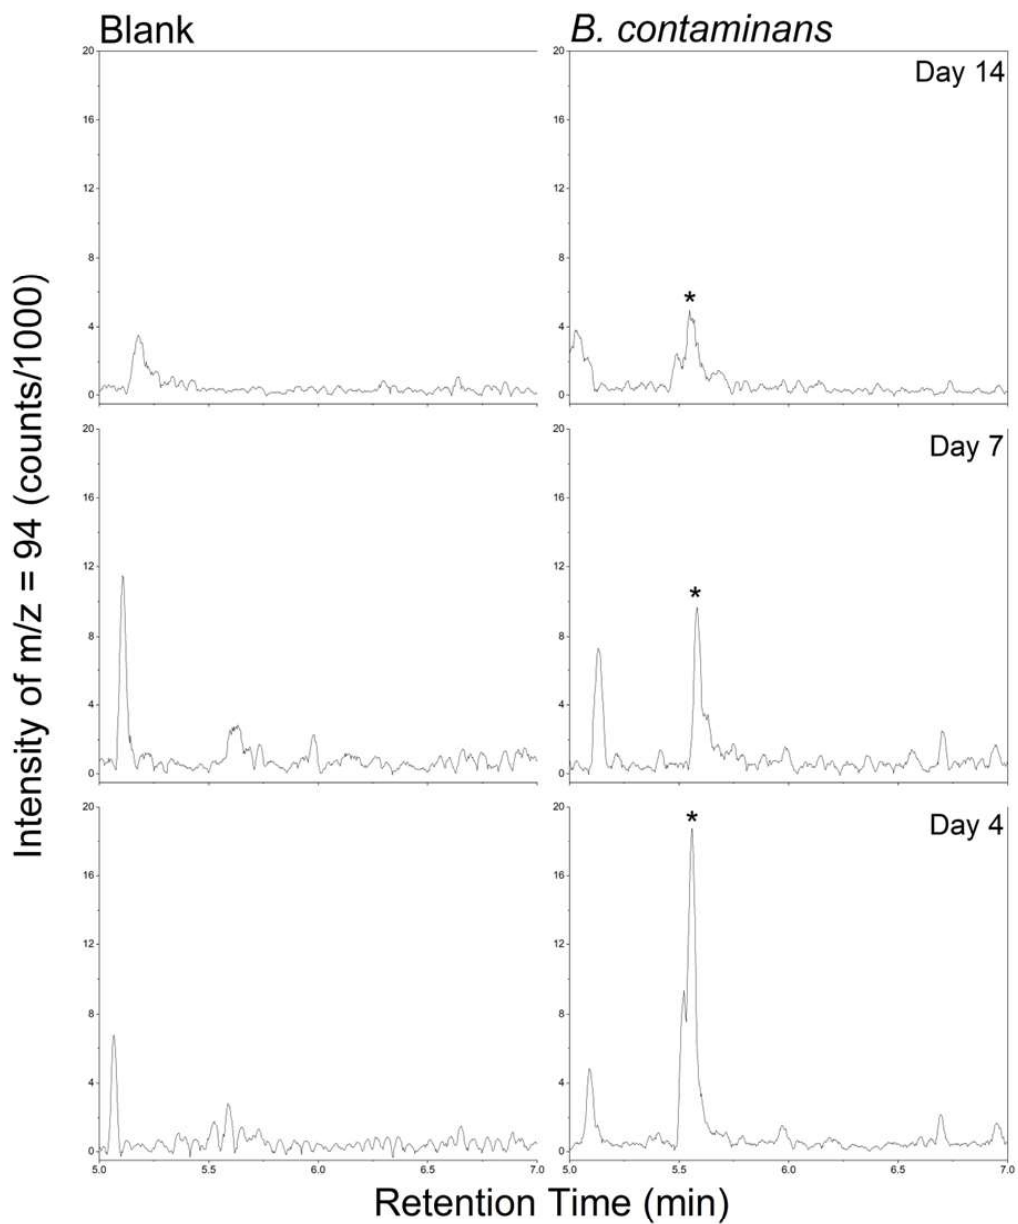

802  
 803 **Figure S3– Extracted ion chromatograms ( $m/z = 94$ ) showing an initial spike in DMDS**  
 804 **(marked with an asterisk) from *B. contaminans* grown in ersatz wastewater with a**  
 805 **subsequent decrease with further growth time. Note the lack of DMDS in the blank**  
 806 **wastewater.**

807  
 808  
 809  
 810  
 811

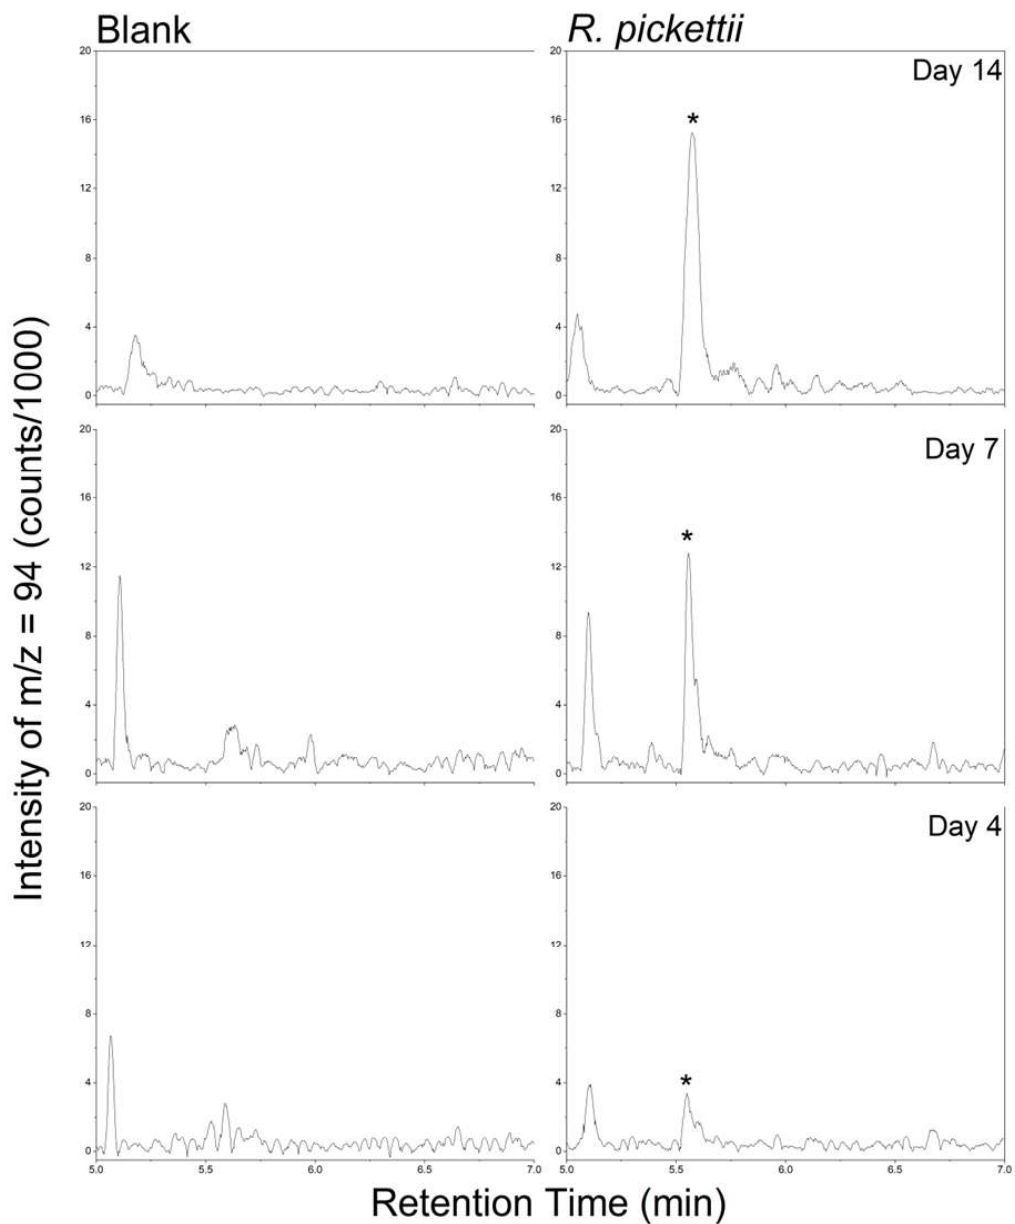

812  
 813  
 814  
 815  
 816  
 817  
 818  
 819  
 820  
 821  
 822  
 823

**Figure S4 – Extracted ion chromatograms ( $m/z = 94$ ) showing the slow growth in DMDS (marked with an asterisk) from *R. pickettii* grown in ersatz wastewater. Note the lack of DMDS in the blank wastewater.**

824  
825  
826  
827

**Table S1 – Volatile organic species present in filtered R2A media following 24-hour growth of *B. contaminans* and *R. pickettii*.**

| Analyte                                 |      | Blank R2A<br>(filtered 24-<br>hour) | <i>B. contaminans</i><br>R2A (filtered 24-<br>hour) | <i>R. pickettii</i><br>R2A (filtered<br>24-hour) | <i>K. aerogenes</i><br>R2A (filtered<br>24-hour) |
|-----------------------------------------|------|-------------------------------------|-----------------------------------------------------|--------------------------------------------------|--------------------------------------------------|
| Total Organic Carbon                    | mg/L | 1020                                | 403                                                 | 446                                              | 408                                              |
| 1-Propanol                              | µg/L |                                     | < 400                                               | < 400                                            | < 400                                            |
| 2-Propanol<br>(Isopropanol)             | µg/L |                                     | < 400                                               | < 400                                            | < 400                                            |
| 3-Methyl-1-<br>butanol<br>(Isopentanol) | µg/L |                                     | < 400                                               | < 400                                            | 5110                                             |
| Acetone                                 | µg/L |                                     | 435                                                 | < 400                                            | 86                                               |
| Dimethyldisulfide<br>(DMDS)             | µg/L |                                     | not found                                           | 100                                              | not found                                        |
| Ethanol                                 | µg/L |                                     | 6160                                                | 2280                                             | < 400                                            |
| Methanol                                | µg/L |                                     | < 400                                               | < 400                                            | < 400                                            |

828  
829  
830  
831

**Table S2 – Volatile organic species present in filtered ersatz wastewater following 7-day growth of *B. contaminans* and *R. pickettii*.**

| Analyte                     |      | Ersatz stock | Blank Ersatz<br>(filtered 7-<br>day) | <i>B. contaminans</i><br>ersatz<br>(filtered 7-<br>day) | <i>R. pickettii</i><br>ersatz<br>(filtered 7-<br>day) |
|-----------------------------|------|--------------|--------------------------------------|---------------------------------------------------------|-------------------------------------------------------|
| Total Organic Carbon        | mg/L | 73.9         | 87.8                                 | 59.4                                                    | 52.0                                                  |
| 1-Propanol                  | µg/L | 686          |                                      | < 400                                                   | 415                                                   |
| 2-Propanol<br>(Isopropanol) | µg/L | 802          |                                      | < 400                                                   | 627                                                   |
| Acetone                     | µg/L | 20400        |                                      | 11100                                                   | 10800                                                 |
| Ethanol                     | µg/L | 31700        |                                      | < 400                                                   | 20900                                                 |
| Methanol                    | µg/L | 16900        |                                      | 14600                                                   | 15900                                                 |
| Trimethylsilanol            | µg/L | 480          |                                      | 140                                                     | 160                                                   |

832
